# Supplementary material for: Facile electrochemical synthesis of titanium dioxide dendrites and their electrochemical properties
Source: Royal Society of Chemistry journal article supplement (doi:10.1039/c4cc09762a), 2015-01-01
Supplement: c4cc09762a1.pdf [file c4cc09762a1.pdf]

## Supporting Information

# Facile electrochemical synthesis of titanium dioxide dendrites and its electrochemical properties

*Sang Ha Lee, Hyuck Lee, MiSuk Cho, and \*Youngkwan Lee*

*School of chemical Engineering, Sungkyunkwan University, Suwon, Republic of Korea. Fax: +82 31 299 4711;  
Tel: +82 31 290 7326; E-mail: yklee@skku.edu*

### Contents

#### **1. Experimental**

- A. Materials
- B. Preparation of titanium dioxide
- C. Characterization

#### **2. Supplementary data**

## **Experimental**

**Materials:** Titanium chloride (20% in 3% hydrochloric acid,  $\text{TiCl}_3$ ) was purchased from Alfa Aesar Co., USA. Potassium nitrate, sodium sulphate, and hydrochloric acid (37%) were purchased from Aldrich Chemical Co. Hydrogen peroxide (35 %), sulfuric acid (95 %), ethanol, and acetone were purchased from Samchun Chemical Co., Korea.

**Preparation of Titanium Dioxide:** Titanium dioxide films were cathodically deposited onto gold plate ( $1 \text{ cm}^2$ ) from 30 mM  $\text{H}_2\text{O}_2$ , 30 mM  $\text{TiCl}_3$ , and 75 mM  $\text{KNO}_3$  aqueous solution in a three-cell system that consisted of platinum plate, gold plate, and Ag/AgCl (saturated with KCl) electrodes as a counter electrode, working electrode, and reference electrode, respectively. Distance between the working electrode and counter electrode was 0.5 cm. The pH of the solution was controlled by the addition of HCl. The Au plate was treated with sulfuric acid, acetone, and ethanol. The electrodeposition was carried out using two different modes (Figure S1): constant potential (CP) at -1.6 V for 100 min, pulse potential (PP) at -1.6 V, and 1.6 V with 0.5/1 sec interval time for 50 min in order to obtain a similar amount of coating mass,  $\sim 1.2 \text{ mgcm}^{-2}$ .

**Characterizations:** The morphology of the  $\text{TiO}_2$  film was observed using a FE-SEM (JSM7000F, JEOL). Their chemical compositions and crystal structure were analyzed using XPS (ESCA2000, VG Microtech) and XRD (D8 Advance, Bruker), respectively. A QCM (QCM922, Seiko Japan) was used for the in-situ analysis of the weight increase of  $\text{TiO}_2$  during electrodeposition.

A three-electrode cell system was used to evaluate the electrochemical properties using a potentiostat (VSP, Princeton Applied Research, USA). Tests were performed in a 0.5 M  $\text{Na}_2\text{SO}_4$  aqueous solution, and a gold plate, a platinum plate, and an Ag/AgCl (saturated with KCl) electrode were used as a working electrode, counter electrode, and reference electrode, respectively. Cyclic voltammetry test was performed between 0 and 0.8 V. The specific capacitance (C in  $\text{Fg}^{-1}$ ) was obtained from the following equation [1]:

$$C = I \cdot \Delta t / \Delta V \cdot m$$

where I is the current loaded (A);  $\Delta t$  is the time (s);  $\Delta V$  is the potential change during the process; and m is the mass of active material in a single electrode (g). The areal capacitance (C in  $\text{Fcm}^{-2}$ ) is calculated from area of electrode instead of loading mass.

## Supplementary data

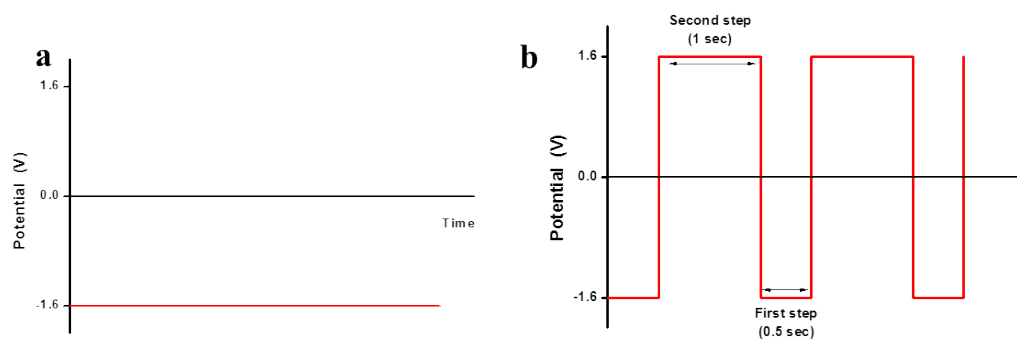

**Figure S1.** The patterns of applying potential; (a) constant potential (CP) at -1.6 V; (b) pulse potential (PP) at -1.6/1.6 V

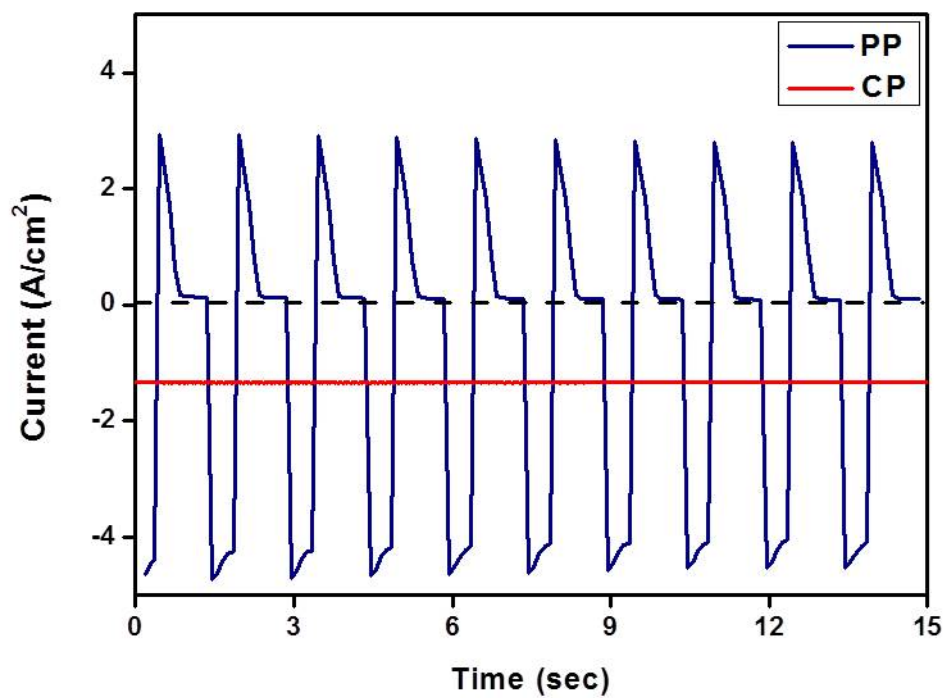

**Figure S2.** Current vs time graph during electrodeposition at PP mode and CP mode

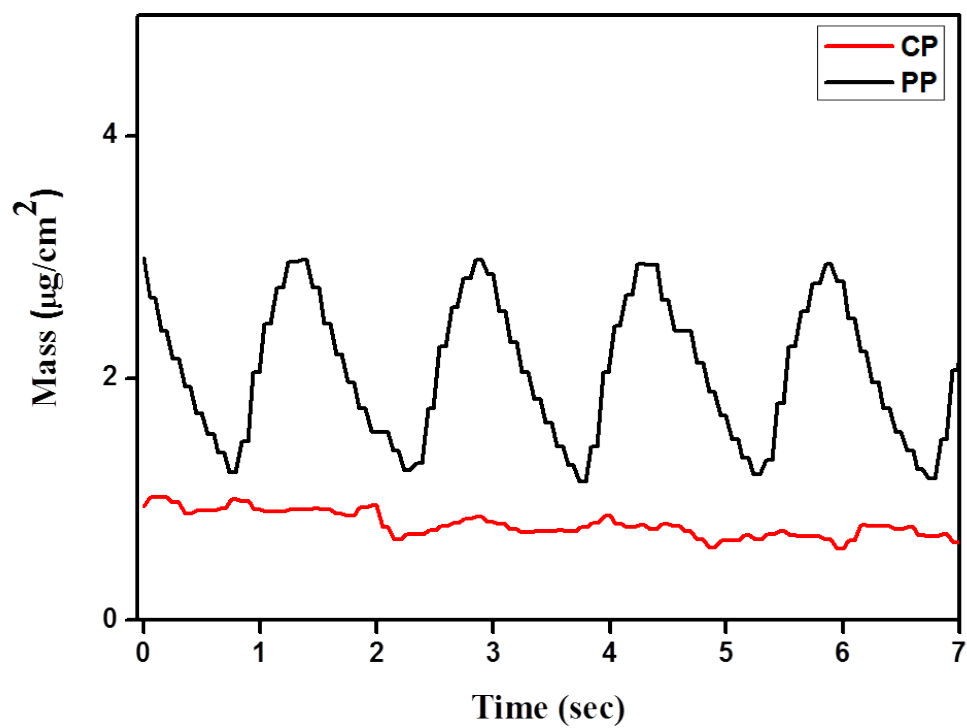

**Figure S3.** Weight variation of the electrode as a function of time in the aqueous solution of Ti(IV) hydroxyl species without using  $\text{KNO}_3$ .

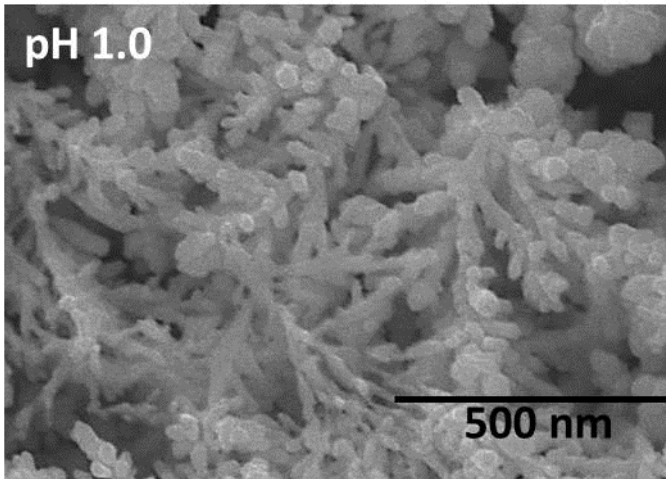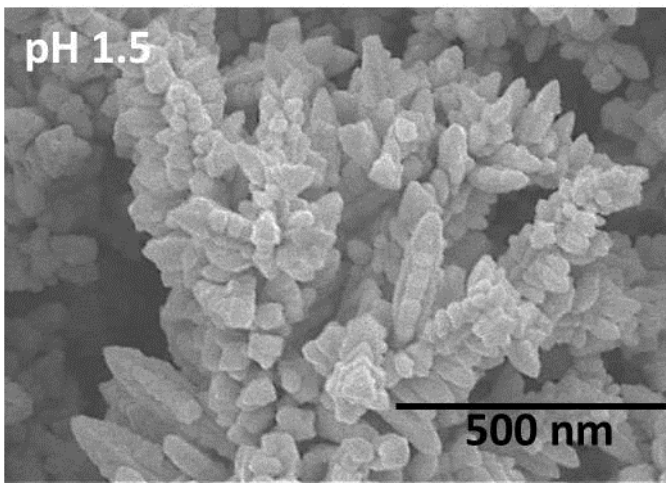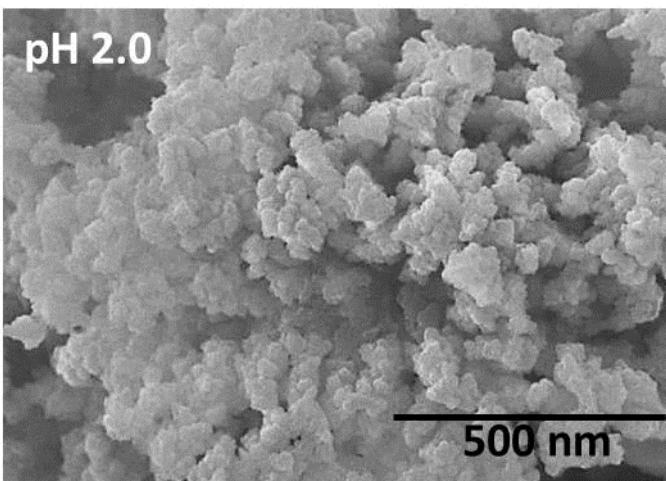

**Figure S4.** SEM image of TiO<sub>2</sub> prepared by PP with a various pH condition: pH 1.0; pH 1.5; pH 2.0.

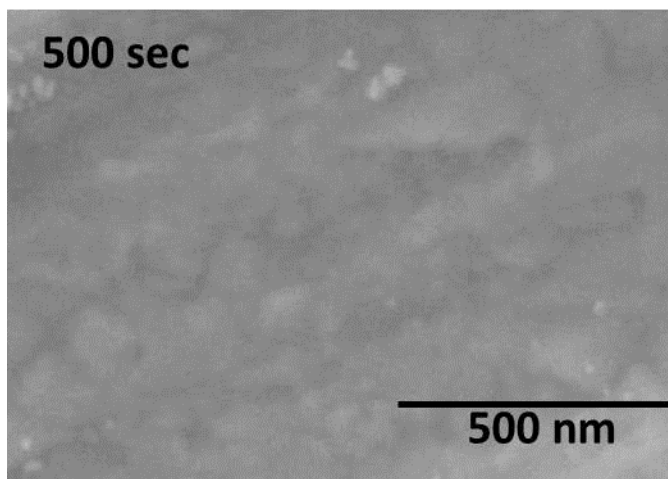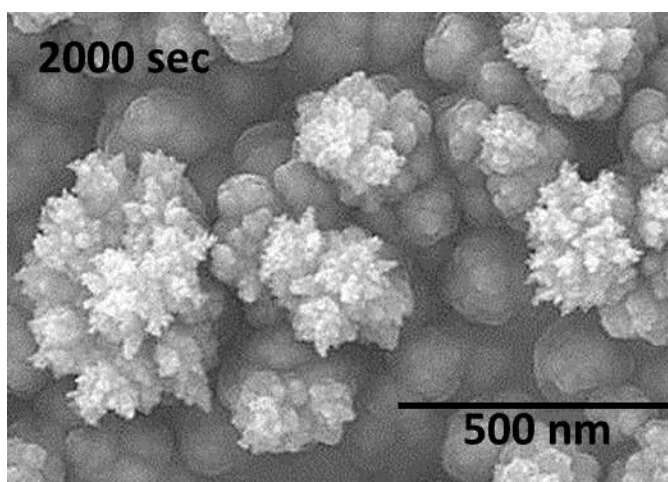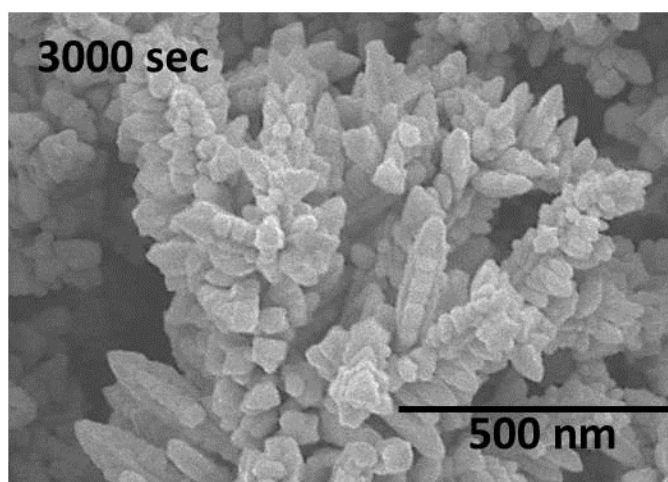

**Figure S5.** SEM image of TiO<sub>2</sub> prepared by PP according to deposition time

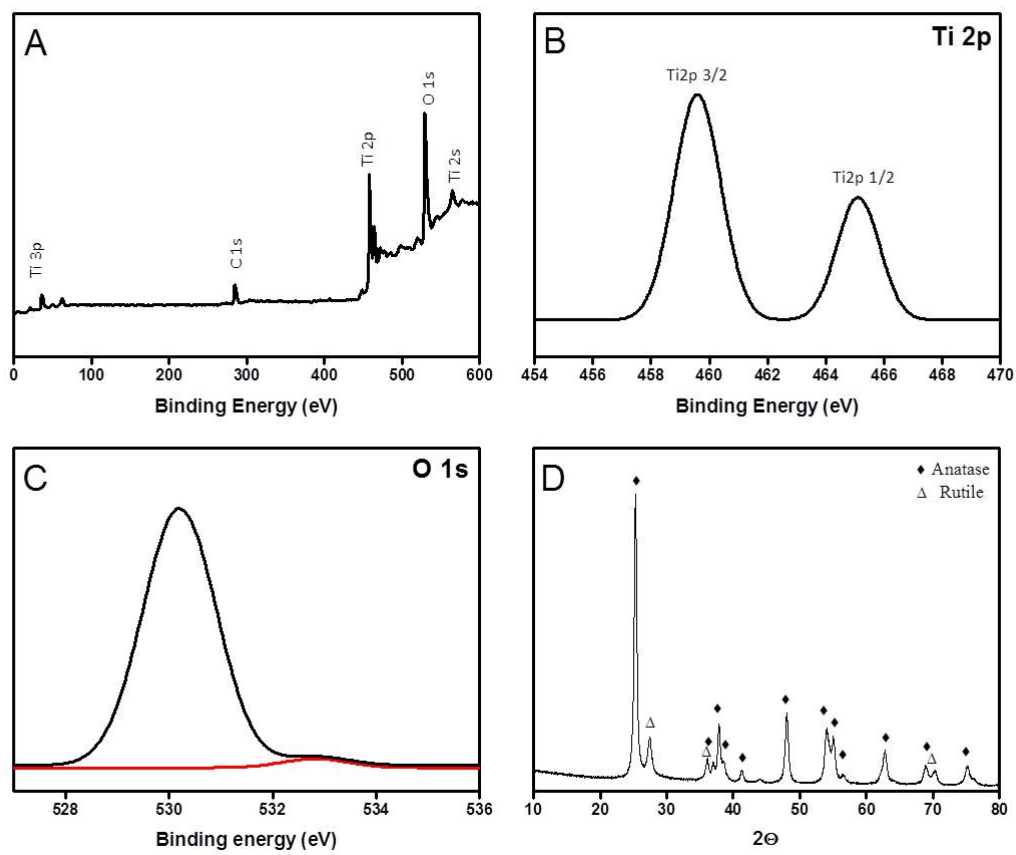

**Figure S6.** (a) XPS spectrum of the TiO<sub>2</sub> dendrite; (a-c) XPS spectra of (b) Ti 2p and (c) O 1s; (d) XRD spectrum of the TiO<sub>2</sub> dendrite



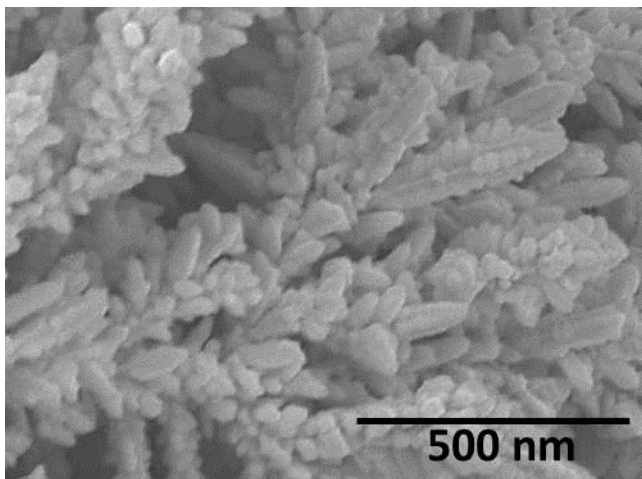

**Figure S7.** SEM image of TiO<sub>2</sub> dendrite after annealing

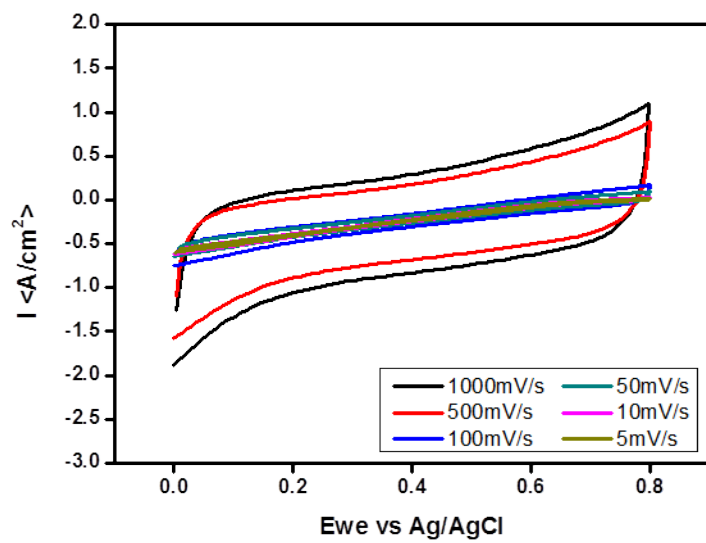

**Figure S8.** Cyclic voltammetry of the  $\text{TiO}_2$  film according to scan rate
